# Supplementary material for: Is male infertility associated with increased oxidative stress in seminal plasma? A-meta analysis
Source: PubMed Central journal article supplement (PMC5966266; doi:10.18632/oncotarget.25075), 2018-05-11
Supplement: oncotarget-09-24494-s001.pdf [file oncotarget-09-24494-s001.pdf]

# Is male infertility associated with increased oxidative stress in seminal plasma? A-meta analysis

## SUPPLEMENTARY MATERIALS

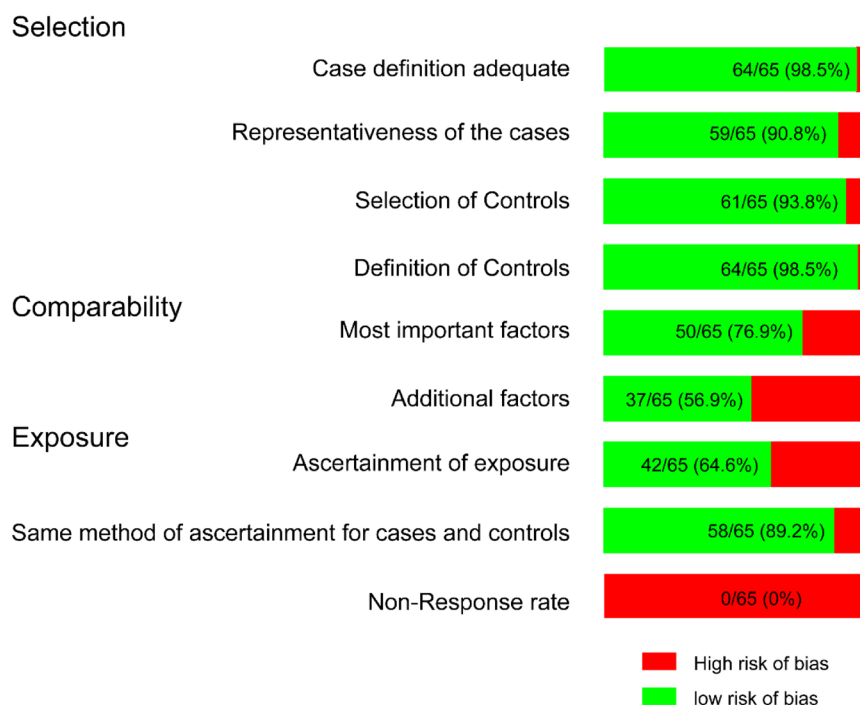

**Supplementary Figure 1: Risk of bias by domain (in bold) and question in nine case-control studies using the Newcastle–Ottawa Scale.** Numbers on the green bar represent the number of studies with low risk of bias over the number of studies assessed.

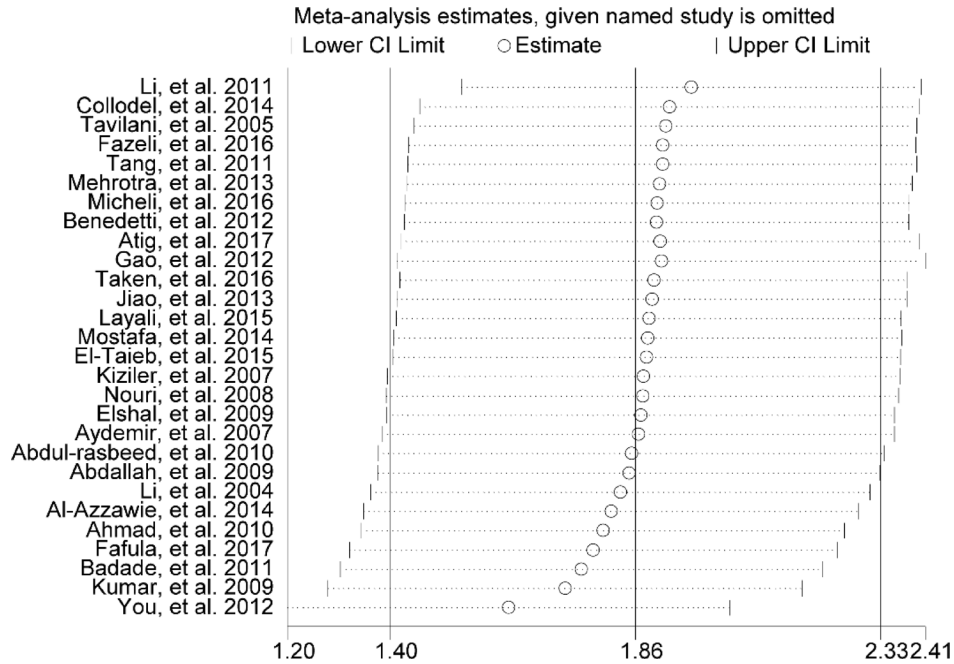

**Supplementary Figure 2: Sensitivity analysis was performed to evaluate the robustness of conclusion addressing the risk factor of MDA.**

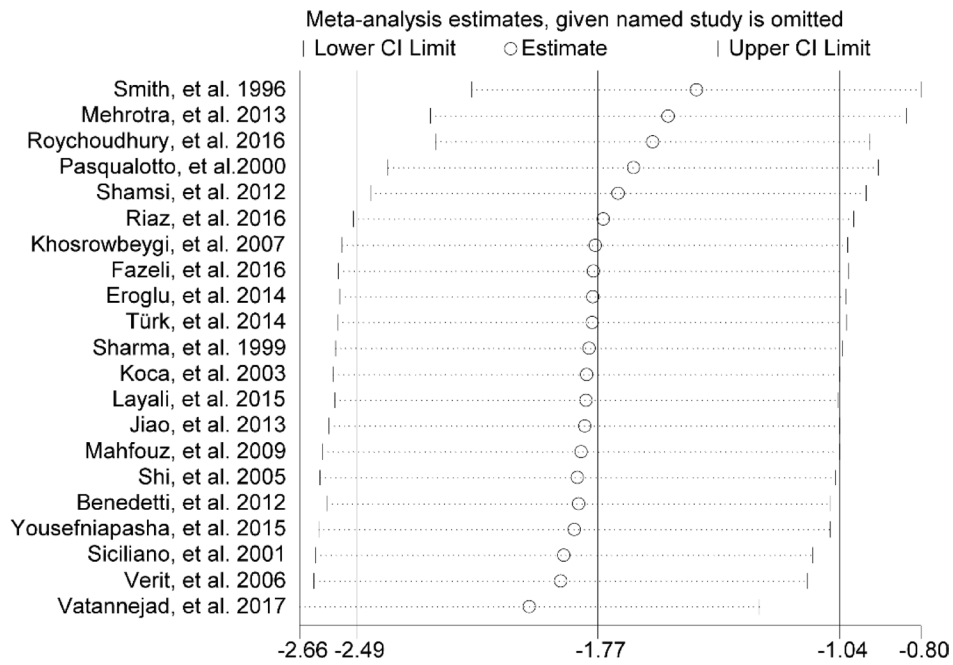

**Supplementary Figure 3: sensitivity analysis was performed to evaluate the robustness of conclusion addressing the risk factor of TAC.**

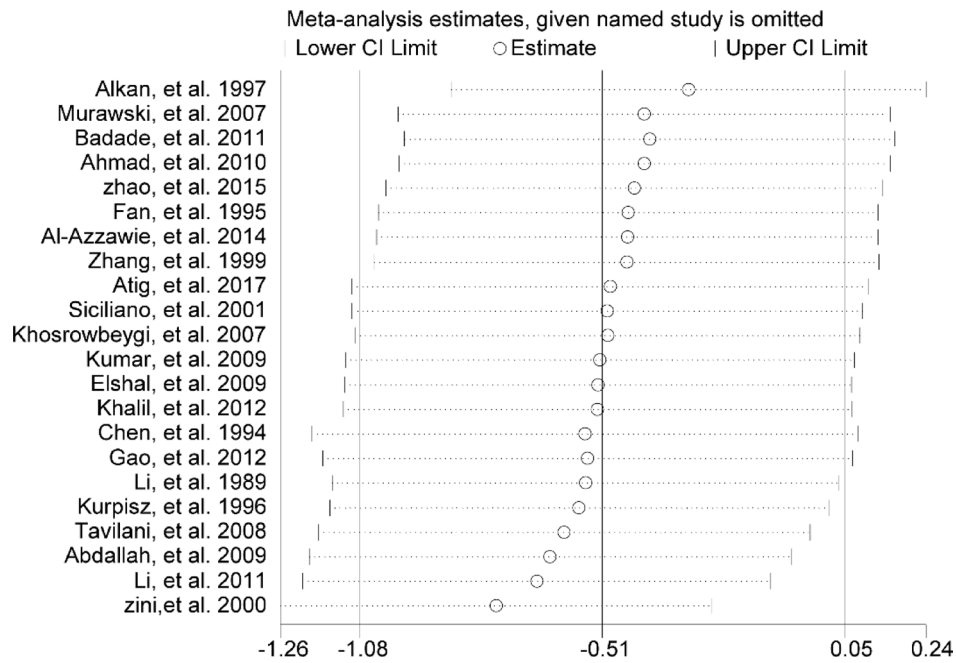

**Supplementary Figure 4: Sensitivity analysis was performed to evaluate the robustness of conclusion addressing the risk factor of SOD.**

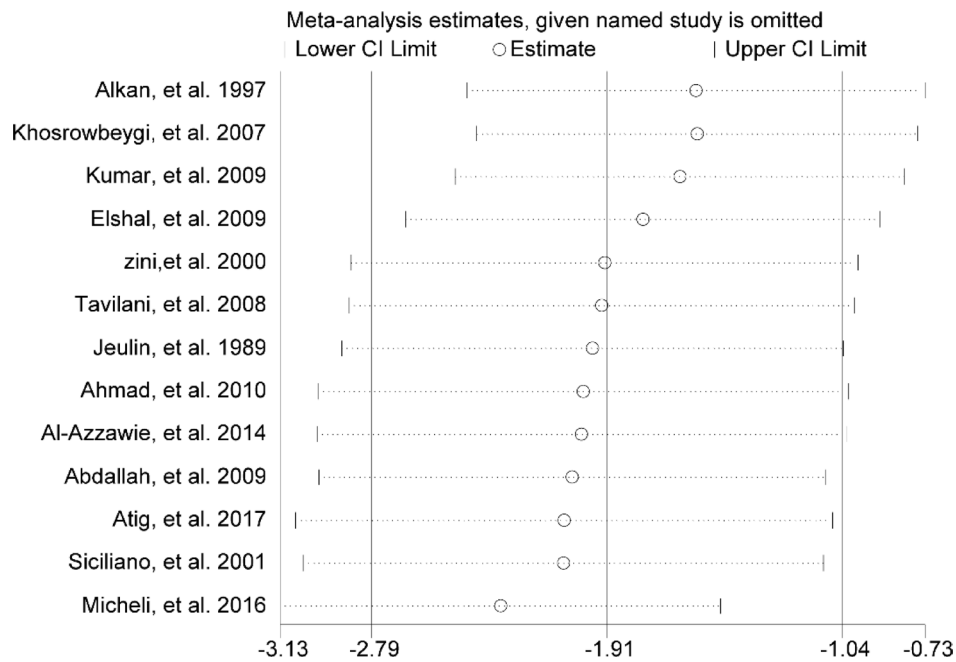

**Supplementary Figure 5: Sensitivity analysis was performed to evaluate the robustness of conclusion addressing the risk factor of catalase.**

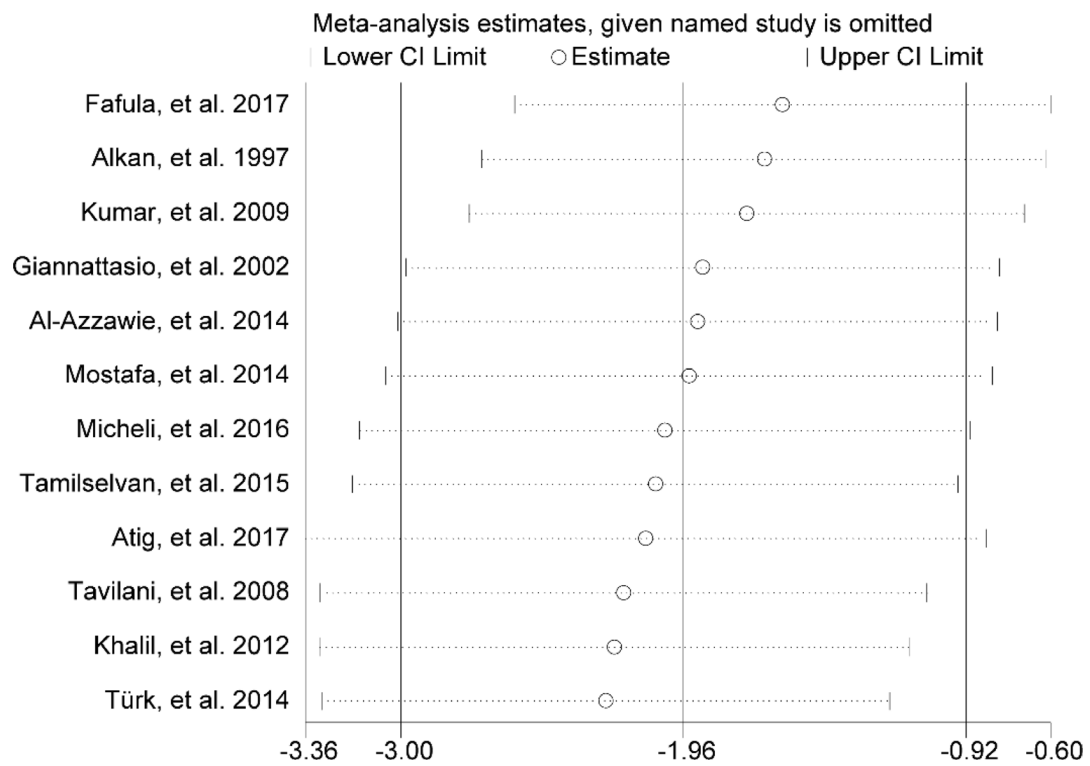

**Supplementary Figure 6: Sensitivity analysis was performed to evaluate the robustness of conclusion addressing the risk factor of GPX.**

**Supplementary Table 1: Summary of findings for the main comparison**

| Outcomes                        | Illustrative comparative risks* (95% CI) |                    | Relative effect (95% CI) | No of Participants (studies)    | Quality of the evidence (GRADE) | Comments                                            |
|---------------------------------|------------------------------------------|--------------------|--------------------------|---------------------------------|---------------------------------|-----------------------------------------------------|
|                                 | Assumed risk                             | Corresponding risk |                          |                                 |                                 |                                                     |
| MDA concentration               | See comment                              | See comment        |                          | 2283 (28 studies <sup>1</sup> ) | ⊕○○○<br>very low <sup>2,3</sup> | 1412 cases and 871 controls in case-control studies |
| Total antioxidant capacity      | See comment                              | See comment        |                          | 1808 (21 studies <sup>1</sup> ) | ⊕○○○<br>very low <sup>2</sup>   | 1255 cases and 553 controls in case-control studies |
| Superoxide dismutase activity   | See comment                              | See comment        |                          | 2568 (22 studies <sup>1</sup> ) | ⊕○○○<br>very low <sup>2</sup>   | 1808 cases and 760 controls in case-control studies |
| Catalase activity               | See comment                              | See comment        |                          | 1003 (13 studies <sup>1</sup> ) | ⊕○○○<br>very low <sup>2</sup>   | 740 cases and 263 controls in case-control studies  |
| Glutathione peroxidase activity | See comment                              | See comment        |                          | 738 (11 studies <sup>1</sup> )  | ⊕○○○<br>very low <sup>2,3</sup> | 458 cases and 280 controls in case-control studies  |
| GSH concentration               | See comment                              | See comment        |                          | 633 (8 studies <sup>1</sup> )   | ⊕○○○<br>very low <sup>2</sup>   | 388 cases and 245 controls in case-control studies  |
| Nitric oxide concentration      | See comment                              | See comment        |                          | 548 (6 studies <sup>1</sup> )   | ⊕○○○<br>very low <sup>2</sup>   | 326 cases and 222 controls in case-control studies  |
| Vitamin E concentration         | See comment                              | See comment        |                          | 432 (5 studies <sup>1</sup> )   | ⊕○○○<br>very low <sup>2</sup>   | 257 cases and 175 controls in case-control studies  |
| Vitamin C concentration         | See comment                              | See comment        |                          | 389 (4 studies <sup>1</sup> )   | ⊕○○○<br>very low <sup>4</sup>   | 226 cases and 163 controls in case-control studies  |
| Carbonyl protein concentration  | See comment                              | See comment        |                          | 387 (4 studies <sup>1</sup> )   | ⊕○○○<br>very low <sup>4</sup>   | 197 cases and 190 controls in case-control studies  |

GRADE Working Group grades of evidence

**High quality:** Further research is very unlikely to change our confidence in the estimate of effect.

**Moderate quality:** Further research is likely to have an important impact on our confidence in the estimate of effect and may change the estimate.

**Low quality:** Further research is very likely to have an important impact on our confidence in the estimate of effect and is likely to change the estimate.

**Very low quality:** We are very uncertain about the estimate.

<sup>1</sup>case-control.

<sup>2</sup>With notable statistical heterogeneity.

<sup>3</sup>Egger's regression analysis displayed an evidence of publication bias.

<sup>4</sup>Total population size is less than 400.
